# Supplementary material for: Identification of quantitative trait loci underlying resistance to southern root-knot and reniform nematodes in soybean accession PI 567516C
Source: PubMed Central journal article supplement (PMC4441734; doi:10.1007/s11032-015-0330-5), 2015-05-23
Supplement: 11032_2015_330_MOESM1_ESM.pdf [file 11032_2015_330_MOESM1_ESM.pdf]

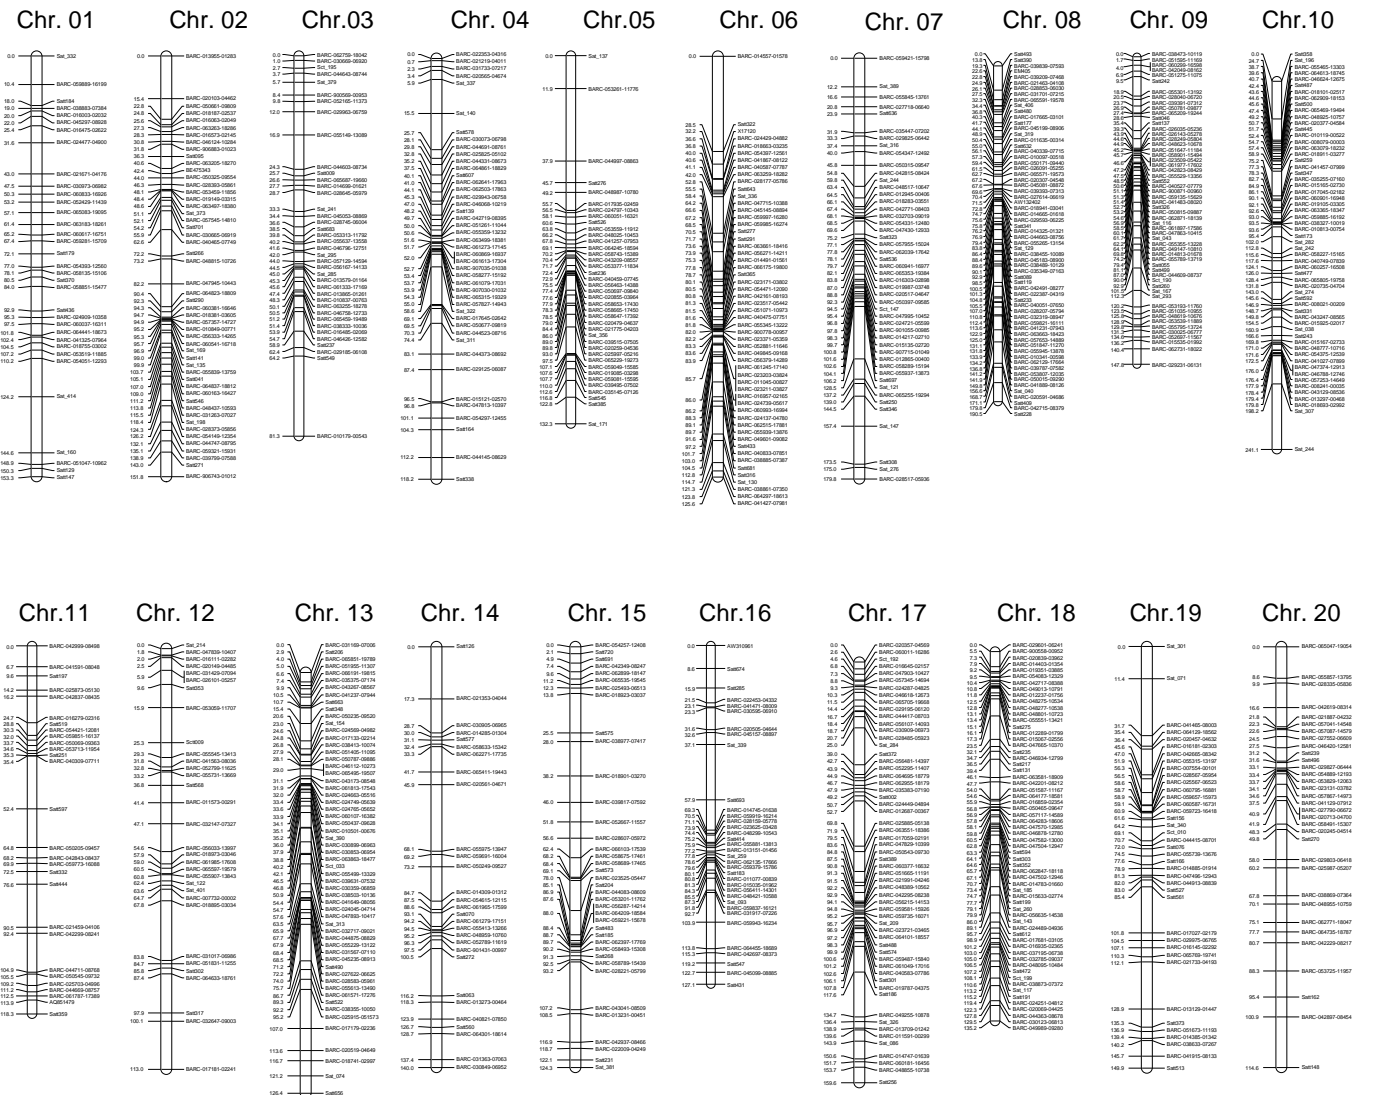

Supplemental Figure 1 Genetic linkage map constructed using a  $F_{6:9}$  recombinant inbred line (RIL) population derived from a Magellan  $\times$  PI 567516C cross
