# Supplementary material for: Identification of quantitative trait loci underlying resistance to southern root-knot and reniform nematodes in soybean accession PI 567516C
Source: Mol Breed. 2015 May 23;35(6):131. doi: 10.1007/s11032-015-0330-5 (PMC4441734; doi:10.1007/s11032-015-0330-5)
Supplement: Supplementary file 2 — Supplementary material 2 (PDF 60 kb) [file 11032_2015_330_MOESM2_ESM.pdf]

**Supplemental Table 1 Sequence variation of *Glyma10g02140* (*Glyma.10g017100*) and *Glyma10g02160* (*Glyma.10g017200*), two candidate genes responsible for SRKN resistance, among 13 soybean lines**

| Soybean line | Reaction to SRKN | Glyma10g02140 (Glyma.10g017100) |                              |                              |                              |                              |                              |                              |                              |                              |                              |                              |                              |                              |                              |                                                          |                              |                              |                              |                              |                              |                              |                              |                              |                              |                                                     |                              |                              |                              |                              |                              |                              |                              |                              |                              |                              |                              |                              |                              |                              |                              |                              |                              |
|--------------|------------------|---------------------------------|------------------------------|------------------------------|------------------------------|------------------------------|------------------------------|------------------------------|------------------------------|------------------------------|------------------------------|------------------------------|------------------------------|------------------------------|------------------------------|----------------------------------------------------------|------------------------------|------------------------------|------------------------------|------------------------------|------------------------------|------------------------------|------------------------------|------------------------------|------------------------------|-----------------------------------------------------|------------------------------|------------------------------|------------------------------|------------------------------|------------------------------|------------------------------|------------------------------|------------------------------|------------------------------|------------------------------|------------------------------|------------------------------|------------------------------|------------------------------|------------------------------|------------------------------|------------------------------|
|              |                  | First exon                      |                              |                              |                              |                              |                              |                              |                              | Intron                       |                              | 2nd exon                     |                              | Intron                       |                              |                                                          |                              |                              |                              |                              |                              |                              |                              |                              |                              |                                                     |                              |                              |                              |                              |                              |                              |                              |                              |                              |                              |                              |                              |                              |                              |                              |                              |                              |
|              |                  | Gm 10: 1,506,154 (1,510,762)    | Gm 10: 1,506,012 (1,510,620) | Gm 10: 1,505,931 (1,510,539) | Gm 10: 1,505,848 (1,510,456) | Gm 10: 1,505,843 (1,510,451) | Gm 10: 1,505,839 (1,510,447) | Gm 10: 1,505,789 (1,510,397) | Gm 10: 1,505,647 (1,510,255) | Gm 10: 1,505,584 (1,510,192) | Gm 10: 1,505,565 (1,510,173) | Gm 10: 1,505,401 (1,510,009) | Gm 10: 1,505,246 (1,509,854) | Gm 10: 1,505,086 (1,509,694) | Gm 10: 1,504,939 (1,509,694) | Gm 10: 1,504,848 (1,509,456)                             | Gm 10: 1,504,598 (1,509,206) | Gm 10: 1,504,384 (1,508,992) | Gm 10: 1,504,257 (1,508,865) | Gm 10: 1,504,216 (1,508,824) | Gm 10: 1,504,209 (1,508,817) | Gm 10: 1,504,159 (1,508,767) | Gm 10: 1,504,125 (1,508,733) | Gm 10: 1,504,086 (1,508,694) | Gm 10: 1,504,012 (1,508,620) | Gm 10: 1,503,953 (1,508,561)                        | Gm 10: 1,503,941 (1,508,549) | Gm 10: 1,503,791 (1,508,399) | Gm 10: 1,503,777 (1,508,385) | Gm 10: 1,503,774 (1,508,382) | Gm 10: 1,503,762 (1,508,370) | Gm 10: 1,503,728 (1,508,336) | Gm 10: 1,503,636 (1,508,244) | Gm 10: 1,503,606 (1,508,214) | Gm 10: 1,503,567 (1,508,175) | Gm 10: 1,503,372 (1,507,980) | Gm 10: 1,503,353 (1,507,961) | Gm 10: 1,503,326 (1,507,934) | Gm 10: 1,503,311 (1,507,919) | Gm 10: 1,503,099 (1,507,707) | Gm 10: 1,503,016 (1,507,624) | Gm 10: 1,502,971 (1,507,579) | Gm 10: 1,502,926 (1,507,534) |
| Williams 82  | s                | G                               | C                            | C                            | A                            | A                            | G                            | C                            | T                            | A                            | A                            | A                            | A                            | A                            | G                            | CTGTTG<br>AAAATA<br>GTCCTA<br>CATTGG<br>ATGTTT<br>ACGAAA | TCT                          | T                            | A                            | GT                           | G                            | AC                           | A                            | A                            | A                            | ATCTTT<br>TTTCA<br>GCATT<br>ATGTT<br>CAATC<br>ACCGA | C                            | G                            | C                            | TC                           | G                            | T                            | C                            | C                            | C                            | C                            | T                            | C                            | A                            | G                            | ATAA                         | G                            | G                            |
| PI 437654    | S                | -                               | -                            | -                            | -                            | -                            | -                            | -                            | -                            | -                            | -                            | -                            | -                            | -                            | -                            | -                                                        | -                            | -                            | -                            | -                            | -                            | -                            | -                            | -                            | -                            | -                                                   | -                            | -                            | -                            | -                            | -                            | -                            | -                            | -                            | -                            | -                            | -                            | -                            | -                            | -                            | -                            | -                            |                              |
| Magellan     | S                | -                               | -                            | -                            | -                            | -                            | -                            | -                            | -                            | -                            | -                            | -                            | -                            | -                            | -                            | -                                                        | -                            | -                            | -                            | -                            | -                            | -                            | -                            | -                            | -                            | -                                                   | -                            | -                            | -                            | -                            | -                            | -                            | -                            | -                            | -                            | -                            | -                            | -                            | -                            | -                            | -                            | -                            |                              |
| PI 424298    | S                | -                               | -                            | -                            | -                            | -                            | -                            | -                            | -                            | -                            | -                            | -                            | -                            | -                            | -                            | -                                                        | -                            | -                            | -                            | -                            | -                            | -                            | -                            | -                            | -                            | -                                                   | -                            | -                            | -                            | -                            | -                            | -                            | -                            | -                            | -                            | -                            | -                            | -                            | -                            | -                            | -                            | -                            |                              |
| Hutcheson    | S                | -                               | -                            | -                            | -                            | -                            | -                            | -                            | -                            | -                            | -                            | -                            | -                            | -                            | -                            | -                                                        | -                            | -                            | -                            | -                            | -                            | -                            | -                            | -                            | -                            | -                                                   | -                            | -                            | -                            | -                            | -                            | -                            | -                            | -                            | -                            | -                            | -                            | -                            | -                            | -                            | -                            | -                            |                              |
| Essex        | S                | -                               | -                            | -                            | -                            | -                            | -                            | -                            | -                            | -                            | -                            | -                            | -                            | -                            | -                            | -                                                        | -                            | -                            | -                            | -                            | -                            | -                            | -                            | -                            | -                            | -                                                   | -                            | -                            | -                            | -                            | -                            | -                            | -                            | -                            | -                            | -                            | -                            | -                            | -                            | -                            | -                            | -                            | -                            |
| PI 438489B   | R                | A                               | T* (V <sup>93</sup> I)       | A* (D <sup>120</sup> Y)      | C                            | C* (L <sup>149</sup> R)      | A                            | T* (C <sup>167</sup> Y)      | A* (E <sup>214</sup> D)      | G                            | A* (Stop)                    | A                            | AAAAA                        | G                            | C                            | T                                                        | C                            | T                            | A                            | G                            | G                            | A                            | A                            | C                            | G                            | A                                                   | T                            | C                            | A                            | T                            | A                            | C                            | G                            | T                            | A                            | T                            | G                            | CCTCTGCC                     | G                            | A                            | A                            | A                            | A                            |
| PI 567516C   | R                | A                               | T* (V <sup>93</sup> I)       | A* (D <sup>120</sup> Y)      | C                            | C* (L <sup>149</sup> R)      | A                            | T* (C <sup>167</sup> Y)      | A* (E <sup>214</sup> D)      | G                            | A* (Stop)                    | A                            | AAAAA                        | G                            | -                            | T                                                        | C                            | T                            | A                            | G                            | G                            | A                            | A                            | C                            | G                            | A                                                   | T                            | C                            | A                            | T                            | A                            | C                            | G                            | T                            | A                            | T                            | G                            | CCTCTGCC                     | G                            | A                            | A                            | A                            | A                            |
| PI 567387    | R                | A                               | T* (V <sup>93</sup> I)       | A* (D <sup>120</sup> Y)      | C                            | C* (L <sup>149</sup> R)      | A                            | T* (C <sup>167</sup> Y)      | A* (E <sup>214</sup> D)      | G                            | A* (Stop)                    | A                            | AAAAA                        | G                            | -                            | T                                                        | C                            | T                            | A                            | G                            | G                            | A                            | A                            | C                            | G                            | A                                                   | T                            | C                            | A                            | T                            | A                            | C                            | G                            | T                            | A                            | T                            | G                            | CCTCTGCC                     | G                            | A                            | A                            | A                            | A                            |
| PI 209332    | R                | A                               | T* (V <sup>93</sup> I)       | A* (D <sup>120</sup> Y)      | C                            | C* (L <sup>149</sup> R)      | A                            | T* (C <sup>167</sup> Y)      | A* (E <sup>214</sup> D)      | G                            | A* (Stop)                    | A                            | AAAAA                        | G                            | -                            | T                                                        | C                            | T                            | A                            | G                            | G                            | A                            | A                            | C                            | G                            | A                                                   | T                            | C                            | A                            | T                            | A                            | C                            | G                            | T                            | A                            | T                            | G                            | CCTCTGCC                     | G                            | A                            | A                            | A                            | A                            |
| PI88788      | R                | A                               | T* (V <sup>93</sup> I)       | A* (D <sup>120</sup> Y)      | C                            | C* (L <sup>149</sup> R)      | A                            | T* (C <sup>167</sup> Y)      | A* (E <sup>214</sup> D)      | G                            | A* (Stop)                    | A                            | AAAAA                        | G                            | C                            | T                                                        | C                            | T                            | A                            | G                            | G                            | A                            | A                            | C                            | G                            | A                                                   | T                            | C                            | A                            | T                            | A                            | C                            | G                            | T                            | A                            | T                            | G                            | CCTCTGCC                     | G                            | A                            | A                            | A                            | A                            |
| PI 567305    | R                | A                               | T* (V <sup>93</sup> I)       | A* (D <sup>120</sup> Y)      | C                            | C* (L <sup>149</sup> R)      | A                            | T* (C <sup>167</sup> Y)      | A* (E <sup>214</sup> D)      | G                            | A* (Stop)                    | A                            | AA                           | G                            | -                            | T                                                        | C                            | T                            | A                            | G                            | -                            | A                            | A                            | C                            | -                            | A                                                   | T                            | C                            | A                            | T                            | A                            | C                            | G                            | T                            | A                            | T                            | G                            | CCTCTGCC                     | G                            | A                            | A                            | A                            | A                            |
| PI 404198B   | R                | A                               | T* (V <sup>93</sup> I)       | A* (D <sup>120</sup> Y)      | C                            | C* (L <sup>149</sup> R)      | A                            | T* (C <sup>167</sup> Y)      | A* (E <sup>214</sup> D)      | G                            | A* (Stop)                    | A                            | AA                           | G                            | -                            | T                                                        | C                            | T                            | A                            | G                            | -                            | A                            | A                            | C                            | -                            | A                                                   | T                            | C                            | A                            | T                            | A                            | C                            | G                            | T                            | A                            | T                            | G                            | CCTCTGCC                     | G                            | A                            | A                            | A                            | A                            |

**Note:**

1. Evaluation of Mi resistance for the above soybean lines were conducted for at least two replicates. S, susceptible; R, resistant.
2. - represent that the position is identical to Williams 82 sequence.
3. The positions highlighted with red color represent the exon.
4. The SNP/Indels highlighted with yellow color represent the sequence variation common in all resistant lines but different from all susceptible lines.
5. The SNPs marked with \* in the exon regions represent nonsynonymous mutation. For other SNPs without \* represent synonymous mutation.

[illegible]

|   |                              |
|---|------------------------------|
| C | Gm 10: 1,515,070 (1,522,022) |
| G | Gm 10: 1,515,085 (1,522,037) |
| C | Gm 10: 1,515,087 (1,522,039) |
| T | Gm 10: 1,515,089 (1,522,041) |
| A | Gm 10: 1,515,234 (1,522,186) |
